# Supplementary material
Source: bioRxiv or medRxiv preprint supplement (https://medrxiv.org/highwire/filestream/75366/field_highwire_adjunct_files/1/2020.04.01.20048686-2.pdf)
Supplement: Supplementary file [file 2020.04.01.20048686-2.pdf]

# Data extraction form

Data collection form adapted from the Cochrane Developmental, Psychosocial and Learning Problems DEF for intervention reviews of RCTs and non-RCTs.

## Review Information

|                     |  |
|---------------------|--|
| Review title or ID  |  |
| First author & Year |  |
| Study ID            |  |
| Notes               |  |

## General Information

|                                                                |  |
|----------------------------------------------------------------|--|
| Date form completed ( <i>dd/mm/yyyy</i> )                      |  |
| Name/ID of person extracting data                              |  |
| Reference citation                                             |  |
| Study author contact details ( <i>name, email</i> )            |  |
| Publication type ( <i>e.g. full report, abstract, letter</i> ) |  |
| Notes:                                                         |  |

## Study eligibility

| Study Characteristics | Eligibility criteria<br><i>(Insert inclusion criteria for each characteristic as defined in the Protocol)</i> | Eligibility criteria met? |                          |                          | Location in text or source ( <i>pg &amp; ¶/fig/table/other</i> ) |
|-----------------------|---------------------------------------------------------------------------------------------------------------|---------------------------|--------------------------|--------------------------|------------------------------------------------------------------|
|                       |                                                                                                               | Yes                       | No                       | Unclear                  |                                                                  |
| Type of study         | Randomised Controlled Trial                                                                                   | <input type="checkbox"/>  | <input type="checkbox"/> | <input type="checkbox"/> |                                                                  |
|                       | Quasi-randomised Controlled Trial                                                                             | <input type="checkbox"/>  | <input type="checkbox"/> | <input type="checkbox"/> |                                                                  |
|                       | Non-randomized controlled trial                                                                               |                           |                          |                          |                                                                  |
|                       | Controlled Before and After Study<br>(Intervention Cohort study with a control group)                         | <input type="checkbox"/>  | <input type="checkbox"/> | <input type="checkbox"/> |                                                                  |
|                       | Cohort study with single group                                                                                |                           |                          |                          |                                                                  |
|                       | Cross-sectional study                                                                                         | <input type="checkbox"/>  | <input type="checkbox"/> | <input type="checkbox"/> |                                                                  |
|                       | Other design (specify):                                                                                       | <input type="checkbox"/>  | <input type="checkbox"/> | <input type="checkbox"/> |                                                                  |
| Participants          | Age (10-40 years)                                                                                             | <input type="checkbox"/>  | <input type="checkbox"/> | <input type="checkbox"/> |                                                                  |
|                       | Activity level: recreationally or more active                                                                 | <input type="checkbox"/>  | <input type="checkbox"/> | <input type="checkbox"/> |                                                                  |

Sports Orthopedic Research Center – Copenhagen: Review on the effect of Nordic Hamstring interventions on performance

|                                                                                                     |                                                                                                                                                                                                            |                                                                            |  |
|-----------------------------------------------------------------------------------------------------|------------------------------------------------------------------------------------------------------------------------------------------------------------------------------------------------------------|----------------------------------------------------------------------------|--|
| Types of intervention                                                                               | Studies prescribing the Nordic Hamstring Exercise in any dose exceeding a minimum of 1 set of 3 repetitions per week in volume for a minimum of 3 weeks will be considered                                 | <input type="checkbox"/> <input type="checkbox"/> <input type="checkbox"/> |  |
| Types of outcome measures                                                                           | <b>Sprint times</b> measured by sensor-based systems, such as laser-sensors, radar-gun or force-plates<br><br>Repeated sprint<br><br>Agility / Change of direction<br><br>Jump performance<br><br>Soreness | <input type="checkbox"/> <input type="checkbox"/> <input type="checkbox"/> |  |
| INCLUDE <input type="checkbox"/>                                                                    |                                                                                                                                                                                                            | EXCLUDE <input type="checkbox"/>                                           |  |
| Reason for exclusion                                                                                |                                                                                                                                                                                                            |                                                                            |  |
| Independently assessed, and then compared? Yes <input type="checkbox"/> No <input type="checkbox"/> |                                                                                                                                                                                                            |                                                                            |  |
| Differences resolved Yes <input type="checkbox"/> No <input type="checkbox"/>                       |                                                                                                                                                                                                            |                                                                            |  |
| Request further details? Yes <input type="checkbox"/> No <input type="checkbox"/>                   |                                                                                                                                                                                                            |                                                                            |  |
| Contact details of authors:                                                                         |                                                                                                                                                                                                            |                                                                            |  |
| Notes:                                                                                              |                                                                                                                                                                                                            |                                                                            |  |

## Characteristics of included studies

### Methods

|                                                                               | Descriptions as stated in report/paper | Location in text |
|-------------------------------------------------------------------------------|----------------------------------------|------------------|
| <b>Primary Aim of study</b><br><i>(e.g. efficacy, equivalence, pragmatic)</i> |                                        |                  |

Sports Orthopedic Research Center – Copenhagen: Review on the effect of Nordic Hamstring interventions on performance

|                                                                           |                                 |                                |                                     |
|---------------------------------------------------------------------------|---------------------------------|--------------------------------|-------------------------------------|
| <b>Aim of intervention</b>                                                |                                 |                                |                                     |
| <b>Secondary aim</b>                                                      |                                 |                                |                                     |
| <b>Design</b> (e.g. parallel, crossover, non-RCT)                         |                                 |                                |                                     |
| <b>Unit of allocation</b> (by individuals, cluster/ groups or body parts) |                                 |                                |                                     |
| <b>Start date</b>                                                         |                                 |                                |                                     |
| <b>End date</b>                                                           |                                 |                                |                                     |
| <b>Duration of participation</b> (from recruitment to last follow-up)     |                                 |                                |                                     |
| <b>Ethical approval needed/ obtained for study</b>                        | <input type="checkbox"/><br>Yes | <input type="checkbox"/><br>No | <input type="checkbox"/><br>Unclear |
| <b>Sources of support</b>                                                 | <input type="checkbox"/><br>Yes | <input type="checkbox"/><br>No | <input type="checkbox"/><br>Unclear |
| <b>Funding reported</b>                                                   | <input type="checkbox"/><br>Yes | <input type="checkbox"/><br>No | <input type="checkbox"/><br>Unclear |
| <b>Pre-registration or protocol available</b>                             | <input type="checkbox"/><br>Yes | <input type="checkbox"/><br>No | <input type="checkbox"/><br>Unclear |
| <b>Conclusions:</b>                                                       |                                 |                                |                                     |
| <b>Primary aim:</b>                                                       |                                 |                                |                                     |
| <b>Secondary aim:</b>                                                     |                                 |                                |                                     |
| <b>Notes &amp; general comments:</b>                                      |                                 |                                |                                     |

Participants

|                                                                                   | <b>Description</b><br><i>Include comparative information for each intervention or comparison group if available</i> | <b>Location in text or source</b> (pg & ¶/fig/table/other) |
|-----------------------------------------------------------------------------------|---------------------------------------------------------------------------------------------------------------------|------------------------------------------------------------|
| <b>Population description</b><br><i>(from which study participants are drawn)</i> |                                                                                                                     |                                                            |
| <b>Setting</b> (including location and social context)                            |                                                                                                                     |                                                            |
| <b>Sport</b>                                                                      |                                                                                                                     |                                                            |
| <b>Sports participation level</b>                                                 |                                                                                                                     |                                                            |
| <b>Inclusion criteria</b>                                                         |                                                                                                                     |                                                            |
| <b>Exclusion criteria</b>                                                         |                                                                                                                     |                                                            |
| <b>Method of recruitment of participants</b> (e.g. phone, mail, clinic patients)  |                                                                                                                     |                                                            |
| <b>Recruitment period</b>                                                         |                                                                                                                     |                                                            |
| <b>Informed consent obtained</b>                                                  | <input type="checkbox"/> Yes <input type="checkbox"/> No <input type="checkbox"/> Unclear                           |                                                            |

| <b>Flow of participants</b>    |                     |                |                                  |
|--------------------------------|---------------------|----------------|----------------------------------|
|                                | <b>Groups</b>       |                | <b>Reasons / Details / Notes</b> |
|                                | <b>Intervention</b> | <b>Control</b> |                                  |
| <b>Invited to participate</b>  |                     |                |                                  |
| <b>Declined to participate</b> |                     |                |                                  |
| <b>Excluded</b>                |                     |                |                                  |
| <b>Randomized</b>              |                     |                |                                  |

Sports Orthopedic Research Center – Copenhagen: Review on the effect of Nordic Hamstring interventions on performance

|                  |  |  |  |
|------------------|--|--|--|
| <b>Dropouts</b>  |  |  |  |
| <b>Completed</b> |  |  |  |
| <b>Analyzed</b>  |  |  |  |

| Baseline characteristics |          |                 |            |                                                          |
|--------------------------|----------|-----------------|------------|----------------------------------------------------------|
| Variables                | Total n: | Intervention n: | Control n: | Between group difference (statistically significant)     |
| Age, mean (sd)           |          |                 |            | <input type="checkbox"/> Yes <input type="checkbox"/> No |
| Gender, M/F, %           |          |                 |            | <input type="checkbox"/> Yes <input type="checkbox"/> No |
| Weight, Kg/lb, mean (sd) |          |                 |            | <input type="checkbox"/> Yes <input type="checkbox"/> No |
| Height, cm, mean (sd)    |          |                 |            | <input type="checkbox"/> Yes <input type="checkbox"/> No |
| BMI, mean (SD)           |          |                 |            | <input type="checkbox"/> Yes <input type="checkbox"/> No |
| Other                    |          |                 |            | <input type="checkbox"/> Yes <input type="checkbox"/> No |

Interventions

| Group                                 | Nordic Hamstring Group                |                  | Comparator Group                      |                  |
|---------------------------------------|---------------------------------------|------------------|---------------------------------------|------------------|
|                                       | Description as stated in report/paper | Location in text | Description as stated in report/paper | Location in text |
| No. in group                          |                                       |                  |                                       |                  |
| Description of intervention as stated |                                       |                  |                                       |                  |
| Isolated NH / Other                   |                                       |                  |                                       |                  |
| Duration of treatment period          |                                       |                  |                                       |                  |
| Session duration                      |                                       |                  |                                       |                  |
| Familiarization                       |                                       |                  |                                       |                  |
| Supervision & Providers               |                                       |                  |                                       |                  |

Sports Orthopedic Research Center – Copenhagen: Review on the effect of Nordic Hamstring interventions on performance

|                                              |                                                                                               |  |  |  |
|----------------------------------------------|-----------------------------------------------------------------------------------------------|--|--|--|
| Frequency                                    |                                                                                               |  |  |  |
| Rest between sessions                        |                                                                                               |  |  |  |
| Progression                                  |                                                                                               |  |  |  |
| Sets                                         |                                                                                               |  |  |  |
| Rest between sets                            |                                                                                               |  |  |  |
| Repetitions                                  |                                                                                               |  |  |  |
| Least weekly reps                            |                                                                                               |  |  |  |
| Most weekly reps                             |                                                                                               |  |  |  |
| Mean weekly rep                              |                                                                                               |  |  |  |
| Load, Kg or %                                |                                                                                               |  |  |  |
| Tempo                                        |                                                                                               |  |  |  |
| Co-interventions                             |                                                                                               |  |  |  |
| Compliance                                   | Pre-defined compliance in the study? <input type="checkbox"/> Yes <input type="checkbox"/> No |  |  |  |
| Compliance description                       |                                                                                               |  |  |  |
| Compliance: Number of NH performed           |                                                                                               |  |  |  |
| Compliance: Proportion of reps performed (%) |                                                                                               |  |  |  |
| Sport exposure, yes/no                       |                                                                                               |  |  |  |
| Total exposure                               |                                                                                               |  |  |  |
| Training exposure                            |                                                                                               |  |  |  |
| Match exposure                               |                                                                                               |  |  |  |
| Notes:                                       |                                                                                               |  |  |  |

Data collection and analyses methodology

|                                                        | Description as stated in report/paper                                                                                                                                                                                                                                                                                                                                                                                                                | Location in text          |                          |                          |                          |  |  |                          |                          |                          |                          |                          |                          |     |    |         |     |    |         |  |
|--------------------------------------------------------|------------------------------------------------------------------------------------------------------------------------------------------------------------------------------------------------------------------------------------------------------------------------------------------------------------------------------------------------------------------------------------------------------------------------------------------------------|---------------------------|--------------------------|--------------------------|--------------------------|--|--|--------------------------|--------------------------|--------------------------|--------------------------|--------------------------|--------------------------|-----|----|---------|-----|----|---------|--|
| <b>Outcomes measured:</b> (list all measured outcomes) |                                                                                                                                                                                                                                                                                                                                                                                                                                                      |                           |                          |                          |                          |  |  |                          |                          |                          |                          |                          |                          |     |    |         |     |    |         |  |
| <b>Time points measured:</b>                           |                                                                                                                                                                                                                                                                                                                                                                                                                                                      |                           |                          |                          |                          |  |  |                          |                          |                          |                          |                          |                          |     |    |         |     |    |         |  |
| <b>Time points reported</b>                            |                                                                                                                                                                                                                                                                                                                                                                                                                                                      |                           |                          |                          |                          |  |  |                          |                          |                          |                          |                          |                          |     |    |         |     |    |         |  |
| <b>Time from intervention to data collection:</b>      | <input type="checkbox"/> Within $\leq 120$ minutes, <input type="checkbox"/> After $\geq 120$ minutes<br><input type="checkbox"/> Within $\leq 4$ weeks, <input type="checkbox"/> After $\geq 4$ weeks.                                                                                                                                                                                                                                              |                           |                          |                          |                          |  |  |                          |                          |                          |                          |                          |                          |     |    |         |     |    |         |  |
| <b>Time from last training session to follow-up</b>    |                                                                                                                                                                                                                                                                                                                                                                                                                                                      |                           |                          |                          |                          |  |  |                          |                          |                          |                          |                          |                          |     |    |         |     |    |         |  |
| <b>Pre-test familiarization</b>                        |                                                                                                                                                                                                                                                                                                                                                                                                                                                      |                           |                          |                          |                          |  |  |                          |                          |                          |                          |                          |                          |     |    |         |     |    |         |  |
| <b>Pre-test warm-Up</b>                                |                                                                                                                                                                                                                                                                                                                                                                                                                                                      |                           |                          |                          |                          |  |  |                          |                          |                          |                          |                          |                          |     |    |         |     |    |         |  |
| <b>Outcome assessor</b>                                |                                                                                                                                                                                                                                                                                                                                                                                                                                                      |                           |                          |                          |                          |  |  |                          |                          |                          |                          |                          |                          |     |    |         |     |    |         |  |
| <b>Statistical power calculation</b>                   | <input type="checkbox"/> Yes <input type="checkbox"/> No <input type="checkbox"/> Unclear                                                                                                                                                                                                                                                                                                                                                            |                           |                          |                          |                          |  |  |                          |                          |                          |                          |                          |                          |     |    |         |     |    |         |  |
| <b>Analyses</b>                                        | <table border="0"> <tr> <td colspan="3"><b>Intention to treat</b></td> <td colspan="3"><b>Per protocol</b></td> </tr> <tr> <td><input type="checkbox"/></td> <td><input type="checkbox"/></td> <td><input type="checkbox"/></td> <td><input type="checkbox"/></td> <td><input type="checkbox"/></td> <td><input type="checkbox"/></td> </tr> <tr> <td>Yes</td> <td>No</td> <td>Unclear</td> <td>Yes</td> <td>No</td> <td>Unclear</td> </tr> </table> | <b>Intention to treat</b> |                          |                          | <b>Per protocol</b>      |  |  | <input type="checkbox"/> | <input type="checkbox"/> | <input type="checkbox"/> | <input type="checkbox"/> | <input type="checkbox"/> | <input type="checkbox"/> | Yes | No | Unclear | Yes | No | Unclear |  |
| <b>Intention to treat</b>                              |                                                                                                                                                                                                                                                                                                                                                                                                                                                      |                           | <b>Per protocol</b>      |                          |                          |  |  |                          |                          |                          |                          |                          |                          |     |    |         |     |    |         |  |
| <input type="checkbox"/>                               | <input type="checkbox"/>                                                                                                                                                                                                                                                                                                                                                                                                                             | <input type="checkbox"/>  | <input type="checkbox"/> | <input type="checkbox"/> | <input type="checkbox"/> |  |  |                          |                          |                          |                          |                          |                          |     |    |         |     |    |         |  |
| Yes                                                    | No                                                                                                                                                                                                                                                                                                                                                                                                                                                   | Unclear                   | Yes                      | No                       | Unclear                  |  |  |                          |                          |                          |                          |                          |                          |     |    |         |     |    |         |  |
|                                                        |                                                                                                                                                                                                                                                                                                                                                                                                                                                      |                           |                          |                          |                          |  |  |                          |                          |                          |                          |                          |                          |     |    |         |     |    |         |  |
|                                                        |                                                                                                                                                                                                                                                                                                                                                                                                                                                      |                           |                          |                          |                          |  |  |                          |                          |                          |                          |                          |                          |     |    |         |     |    |         |  |
|                                                        |                                                                                                                                                                                                                                                                                                                                                                                                                                                      |                           |                          |                          |                          |  |  |                          |                          |                          |                          |                          |                          |     |    |         |     |    |         |  |
|                                                        |                                                                                                                                                                                                                                                                                                                                                                                                                                                      |                           |                          |                          |                          |  |  |                          |                          |                          |                          |                          |                          |     |    |         |     |    |         |  |
|                                                        |                                                                                                                                                                                                                                                                                                                                                                                                                                                      |                           |                          |                          |                          |  |  |                          |                          |                          |                          |                          |                          |     |    |         |     |    |         |  |
|                                                        |                                                                                                                                                                                                                                                                                                                                                                                                                                                      |                           |                          |                          |                          |  |  |                          |                          |                          |                          |                          |                          |     |    |         |     |    |         |  |

Sports Orthopedic Research Center – Copenhagen: Review on the effect of Nordic Hamstring interventions on performance

Notes:

Outcomes

Copy and paste for each relevant outcome.

|                                                                            | Description as stated in report/paper                                                     | Location in text |
|----------------------------------------------------------------------------|-------------------------------------------------------------------------------------------|------------------|
| <b>Outcome</b>                                                             | Sprint testing                                                                            |                  |
| <b>Unit of measurement</b>                                                 | Seconds                                                                                   |                  |
| <b>Measurement tool</b>                                                    |                                                                                           |                  |
| <b>Test familiarization</b>                                                |                                                                                           |                  |
| <b>Test warm-Up</b>                                                        |                                                                                           |                  |
| <b>Test procedure</b>                                                      |                                                                                           |                  |
| <b>Data used for analyses</b>                                              |                                                                                           |                  |
| <b>Description of measurement precision?</b>                               | <input type="checkbox"/> Yes <input type="checkbox"/> No <input type="checkbox"/> Unclear |                  |
| <b>ICC values</b>                                                          |                                                                                           |                  |
| <b>CV values</b>                                                           |                                                                                           |                  |
| <b>Other measurement properties</b>                                        |                                                                                           |                  |
| <b>Imputation of missing data (e.g. assumptions made for ITT analysis)</b> |                                                                                           |                  |

Notes:



Results – Data for analyses

Copy table for relevant outcomes. Primary and secondary outcomes suggested.

Acceleration

|                              | Description as stated in report/paper |       |       |            |       |   | Location in text |
|------------------------------|---------------------------------------|-------|-------|------------|-------|---|------------------|
| Outcome                      | Sprint < 20 meters (5m, 10m, 15m)     |       |       |            |       |   |                  |
| Pre-intervention             | Nordic Hamstring                      |       |       | Comparison |       |   |                  |
|                              | Mean                                  | SD/SE | N     | Mean       | SD/SE | N |                  |
|                              |                                       |       |       |            |       |   |                  |
| Post-intervention Timepoint: | Nordic Hamstring                      |       |       | Comparison |       |   |                  |
|                              | Mean                                  | SD/SE | n     | Mean       | SD/SE | N |                  |
|                              |                                       |       |       |            |       |   |                  |
| Change from baseline         | Nordic Hamstring                      |       |       | Comparison |       |   |                  |
|                              |                                       |       |       |            |       |   |                  |
| Between group differences    | Mean                                  |       | SD/SE |            | n     |   |                  |
|                              |                                       |       |       |            |       |   |                  |
| N missing                    |                                       |       |       |            |       |   |                  |
| Reasons missing              |                                       |       |       |            |       |   |                  |
| Cross-overs                  |                                       |       |       |            |       |   |                  |
| Units of analysis            |                                       |       |       |            |       |   |                  |
| Statistical methods used     |                                       |       |       |            |       |   |                  |

Maximal velocity

|                              | Description as stated in report/paper |       |   |            |       |   | Location in text |
|------------------------------|---------------------------------------|-------|---|------------|-------|---|------------------|
| Outcome                      | Sprint ≥ 20 meters (20m, 30m, 40m)    |       |   |            |       |   |                  |
| Pre-intervention             | Nordic Hamstring                      |       |   | Comparison |       |   |                  |
|                              | Mean                                  | SD/SE | N | Mean       | SD/SE | N |                  |
|                              |                                       |       |   |            |       |   |                  |
| Post-intervention Timepoint: | Nordic Hamstring                      |       |   | Comparison |       |   |                  |
|                              | Mean                                  | SD/SE | n | Mean       | SD/SE | N |                  |
|                              |                                       |       |   |            |       |   |                  |
| Change from baseline         | Nordic Hamstring                      |       |   | Comparison |       |   |                  |
|                              |                                       |       |   |            |       |   |                  |

Sports Orthopedic Research Center – Copenhagen: Review on the effect of Nordic Hamstring interventions on performance

|                           |      |       |   |  |
|---------------------------|------|-------|---|--|
| Between group differences | Mean | SD/SE | n |  |
|                           |      |       |   |  |
| No missing                |      |       |   |  |
| Reasons missing           |      |       |   |  |
| Cross-overs               |      |       |   |  |
| Units of analysis         |      |       |   |  |
| Statistical methods used  |      |       |   |  |

Repeated sprint ability

|                                 | Description as stated in report/paper                      |       |       |            |       |   | Location in text |
|---------------------------------|------------------------------------------------------------|-------|-------|------------|-------|---|------------------|
| Outcome                         | Repeated sprint ability (distance, set, reps, rest-period) |       |       |            |       |   |                  |
| Pre-intervention                | Nordic Hamstring                                           |       |       | Comparison |       |   |                  |
|                                 | Mean                                                       | SD/SE | N     | Mean       | SD/SE | N |                  |
|                                 |                                                            |       |       |            |       |   |                  |
| Post-intervention<br>Timepoint: | Nordic Hamstring                                           |       |       | Comparison |       |   |                  |
|                                 | Mean                                                       | SD/SE | n     | Mean       | SD/SE | N |                  |
|                                 |                                                            |       |       |            |       |   |                  |
| Change from baseline            | Nordic Hamstring                                           |       |       | Comparison |       |   |                  |
|                                 |                                                            |       |       |            |       |   |                  |
| Between group differences       | Mean                                                       |       | SD/SE |            | n     |   |                  |
|                                 |                                                            |       |       |            |       |   |                  |
| No missing                      |                                                            |       |       |            |       |   |                  |
| Reasons missing                 |                                                            |       |       |            |       |   |                  |
| Cross-overs                     |                                                            |       |       |            |       |   |                  |
| Units of analysis               |                                                            |       |       |            |       |   |                  |
| Statistical methods used        |                                                            |       |       |            |       |   |                  |

Change of direction

|         | Description as stated in report/paper |            | Location in text |
|---------|---------------------------------------|------------|------------------|
| Outcome | Agility                               |            |                  |
|         | Nordic Hamstring                      | Comparison |                  |

Sports Orthopedic Research Center – Copenhagen: Review on the effect of Nordic Hamstring interventions on performance

|                              |                  |       |       |            |       |   |  |
|------------------------------|------------------|-------|-------|------------|-------|---|--|
| Pre-intervention             | Mean             | SD/SE | N     | Mean       | SD/SE | N |  |
| Post-intervention Timepoint: | Nordic Hamstring |       |       | Comparison |       |   |  |
|                              | Mean             | SD/SE | n     | Mean       | SD/SE | N |  |
| Change from baseline         | Nordic Hamstring |       |       | Comparison |       |   |  |
|                              |                  |       |       |            |       |   |  |
| Between group differences    | Mean             |       | SD/SE |            | n     |   |  |
|                              |                  |       |       |            |       |   |  |
| No missing                   |                  |       |       |            |       |   |  |
| Reasons missing              |                  |       |       |            |       |   |  |
| Cross-overs                  |                  |       |       |            |       |   |  |
| Units of analysis            |                  |       |       |            |       |   |  |
| Statistical methods used     |                  |       |       |            |       |   |  |

Jump performance

If more than one jump performance outcome, copy table and repeat for second jump measure.

|                              |                                       |       |       |            |       |   |                  |
|------------------------------|---------------------------------------|-------|-------|------------|-------|---|------------------|
|                              | Description as stated in report/paper |       |       |            |       |   | Location in text |
| Outcome                      | CMJ / SJ / VJ / Other                 |       |       |            |       |   |                  |
| Pre-intervention             | Nordic Hamstring                      |       |       | Comparison |       |   |                  |
|                              | Mean                                  | SD/SE | N     | Mean       | SD/SE | N |                  |
|                              |                                       |       |       |            |       |   |                  |
| Post-intervention Timepoint: | Nordic Hamstring                      |       |       | Comparison |       |   |                  |
|                              | Mean                                  | SD/SE | n     | Mean       | SD/SE | N |                  |
|                              |                                       |       |       |            |       |   |                  |
| Change from baseline         | Nordic Hamstring                      |       |       | Comparison |       |   |                  |
|                              |                                       |       |       |            |       |   |                  |
| Between group differences    | Mean                                  |       | SD/SE |            | n     |   |                  |
|                              |                                       |       |       |            |       |   |                  |
| No missing                   |                                       |       |       |            |       |   |                  |
| Reasons missing              |                                       |       |       |            |       |   |                  |

Sports Orthopedic Research Center – Copenhagen: Review on the effect of Nordic Hamstring interventions on performance

|                          |  |  |
|--------------------------|--|--|
| Cross-overs              |  |  |
| Units of analysis        |  |  |
| Statistical methods used |  |  |

Soreness due to intervention

|                                 | Description as stated in report/paper |       |       |            |       |   | Location in text |
|---------------------------------|---------------------------------------|-------|-------|------------|-------|---|------------------|
| Outcome                         | Soreness / DOMS                       |       |       |            |       |   |                  |
| Pre-intervention                | Nordic Hamstring                      |       |       | Comparison |       |   |                  |
|                                 | Mean                                  | SD/SE | N     | Mean       | SD/SE | N |                  |
|                                 |                                       |       |       |            |       |   |                  |
| Post-intervention<br>Timepoint: | Nordic Hamstring                      |       |       | Comparison |       |   |                  |
|                                 | Mean                                  | SD/SE | n     | Mean       | SD/SE | N |                  |
|                                 |                                       |       |       |            |       |   |                  |
| Change from baseline            | Nordic Hamstring                      |       |       | Comparison |       |   |                  |
|                                 |                                       |       |       |            |       |   |                  |
| Between group differences       | Mean                                  |       | SD/SE |            | n     |   |                  |
|                                 |                                       |       |       |            |       |   |                  |
| No missing                      |                                       |       |       |            |       |   |                  |
| Reasons missing                 |                                       |       |       |            |       |   |                  |
| Cross-overs                     |                                       |       |       |            |       |   |                  |
| Units of analysis               |                                       |       |       |            |       |   |                  |
| Statistical methods used        |                                       |       |       |            |       |   |                  |

Adverse events

Adverse events reported in relation to performing NH program or comparator.

|                           | Description as stated in report/paper                                                     |                   | Location in text |
|---------------------------|-------------------------------------------------------------------------------------------|-------------------|------------------|
| Registered adverse events | <input type="checkbox"/> Yes <input type="checkbox"/> No <input type="checkbox"/> Unclear |                   |                  |
| Total adverse events      | NH group:                                                                                 | Comparison group: |                  |
| Types of adverse events   |                                                                                           |                   |                  |
